# Supplementary material for: Impact of Second Trimester Maternal Dietary Intake on Gestational Weight Gain and Neonatal Birth Weight
Source: PubMed Central journal article supplement (PMC5490606; doi:10.3390/nu9060627), 2017-06-17
Supplement: nutrients-09-00627-s001.pdf [file nutrients-09-00627-s001.pdf]

## Supplementary File

Figure S1. Process of data collection

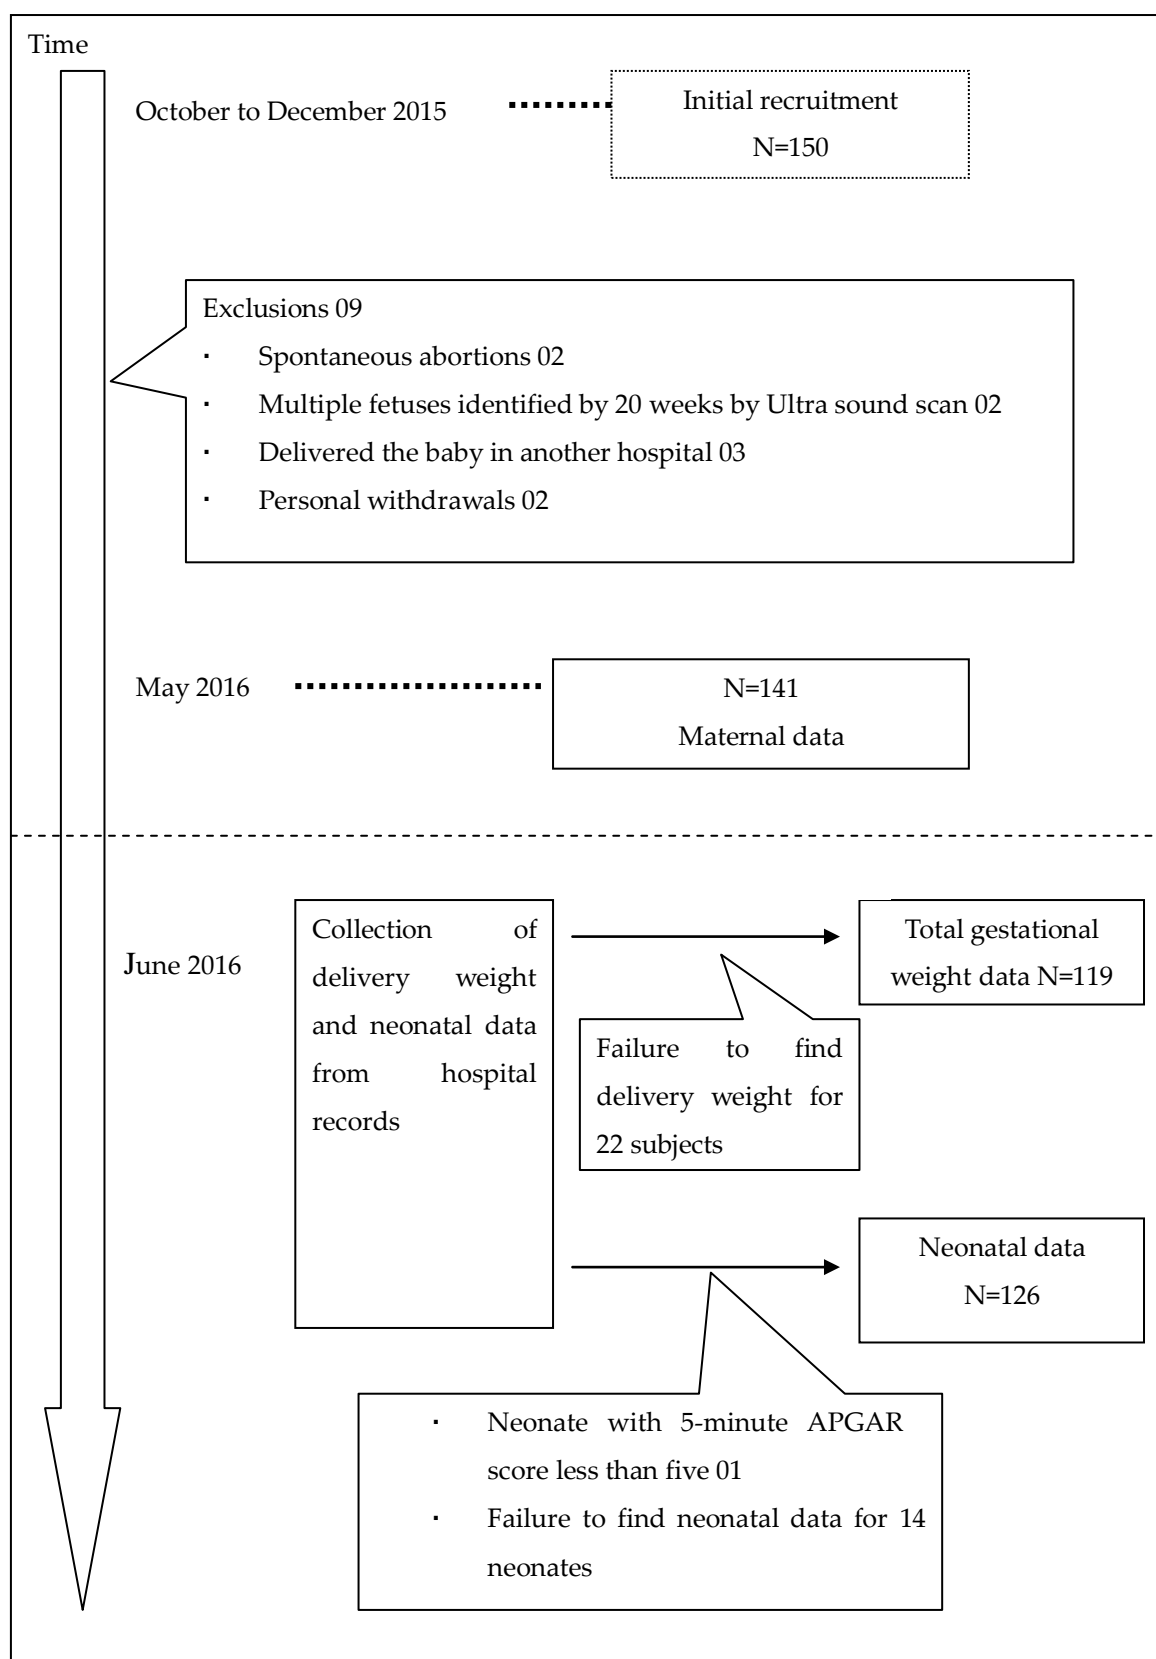

Figure S2. Example estimation of portion sizes for curry dishes (bean curry)

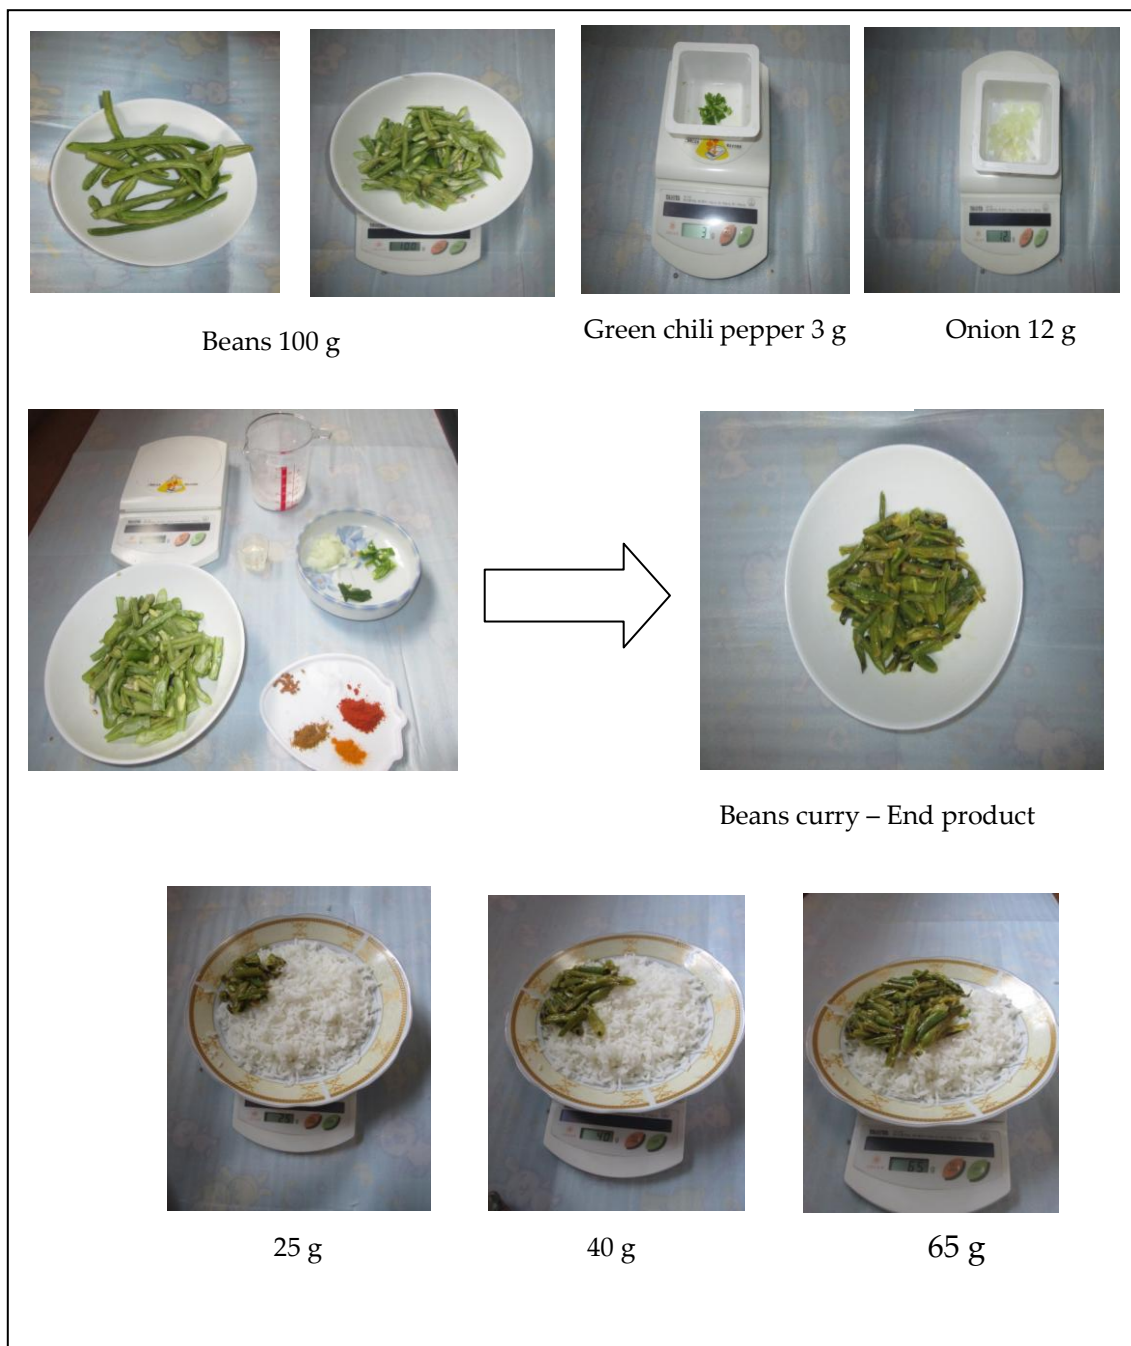

**Table S1.** Second trimester maternal energy and macro-nutrient intake by maternal and neonatal characteristics ( $n = 136$ ); ANOVA

| Variable                                            | Energy Intake  |                 | Carbohydrate Intake |                 | Protein Intake |                 | Fat Intake  |                 |
|-----------------------------------------------------|----------------|-----------------|---------------------|-----------------|----------------|-----------------|-------------|-----------------|
|                                                     | Mean (SD)      | <i>p</i> -Value | Mean (SD)           | <i>p</i> -Value | Mean (SD)      | <i>p</i> -Value | Mean (SD)   | <i>p</i> -Value |
| All                                                 | 2921.5 (687.7) |                 | 532.7 ± 133.8       |                 | 71.2 (16.8)    |                 | 45.8 (16.9) |                 |
| Level of education                                  |                |                 |                     |                 |                |                 |             |                 |
| No/Up to primary                                    | 22             | 2842 (668)      | 524.9 (129.9)       |                 | 69.0 (17.0)    |                 | 40.1 (13.6) |                 |
| Secondary                                           | 108            | 2927 (699.9)    | 533.0 (136.9)       | 0.960           | 71.3 (16.9)    | 0.673           | 46.2 (17.3) | 0.287           |
| Higher                                              | 4              | 3053 (705)      | 540.1 (126.3)       |                 | 74.9 (13.9)    |                 | 54.8 (18.8) |                 |
| Level of monthly household income                   |                |                 |                     |                 |                |                 |             |                 |
| <9000 LKR                                           | 4              | 2608 (555)      | 464.1 (147.6)       |                 | 68.2 (9.7)     |                 | 43.6 (9.9)  |                 |
| 9000-13,999 LKR                                     | 22             | 2940 (624)      | 549.7 (118.8)       |                 | 69.3 (15.1)    |                 | 41.3 (15.0) |                 |
| 14,000- 19,999 LKR                                  | 39             | 2981 (672)      | 555.7 (137.7)       | 0.440           | 70.6 (14.7)    | 0.870           | 42.4 (14.9) | 0.122           |
| 20,000-31,999 LKR                                   | 51             | 2856.2 (706.8)  | 511.5 (130.0)       |                 | 71.2 (19.8)    |                 | 47.8 (18.1) |                 |
| ≥32,000 LKR                                         | 18             | 2993 (819)      | 531.0 (155.8)       |                 | 74.8 (18.6)    |                 | 53.0 (19.0) |                 |
| Area of residence                                   |                |                 |                     |                 |                |                 |             |                 |
| Urban                                               | 13             | 2781 (718)      | 509.2 (134.8)       |                 | 68.1 (17.4)    |                 | 41.9 (16.1) |                 |
| Suburban                                            | 59             | 2906.2 (751)    | 522.9 (141.4)       | 0.613           | 71.9 (19.1)    | 0.767           | 48.3 (19.7) | 0.242           |
| Rural                                               | 61             | 2940.9 (626.5)  | 542.2 (127.8)       |                 | 70.7 (14.7)    |                 | 43.8 (14.0) |                 |
| History of LBW deliveries                           |                |                 |                     |                 |                |                 |             |                 |
| Yes                                                 | 28             | 2875 (726)      | 515.7 (142)         |                 | 70.7 (17.3)    |                 | 48.3 (19.0) |                 |
| No                                                  | 108            | 2933.6 (680.4)  | 537.1 (131.9)       | 0.454           | 71.3 (16.7)    | 0.867           | 45.2 (6.4)  | 0.384           |
| History of miscarriage/abortion                     |                |                 |                     |                 |                |                 |             |                 |
| Yes                                                 | 37             | 2921 (661)      | 532.9 (124.8)       |                 | 70.6 (16.6)    |                 | 45.8 (17.9) |                 |
| No                                                  | 99             | 2921.8 (700.7)  | 532.6 (137.6)       | 0.991           | 71.4 (17.0)    | 0.814           | 45.8 (16.7) | 0.984           |
| Presence of hyperemesis                             |                |                 |                     |                 |                |                 |             |                 |
| Yes                                                 | 21             | 3019 (736)      | 539.8 (145.9)       |                 | 74 (17.2)      |                 | 51.3 (19.0) |                 |
| No                                                  | 113            | 2898.5 (683.9)  | 530.4 (133.0)       | 0.464           | 70.6 (16.9)    | 0.401           | 44.7 (16.4) | 0.102           |
| Parity                                              |                |                 |                     |                 |                |                 |             |                 |
| Primiparous                                         | 43             | 3008 (660)      | 553.9 (124.0)       |                 | 74.2 (17.5)    |                 | 44.7 (18.2) |                 |
| Multiparous                                         | 93             | 2881.4 (699.8)  | 522.9 (137.7)       | 0.210           | 69.8 (16.4)    | 0.151           | 46.3 (16.4) | 0.595           |
| Pre-pregnancy BMI category <sup>a</sup>             |                |                 |                     |                 |                |                 |             |                 |
| Underweight                                         | 27             | 2920 (671)      | 520.1 (127.9)       |                 | 72.7 (17.2)    |                 | 49.7 (17.5) |                 |
| Normal                                              | 78             | 2879 (658.2)    | 530.7 (132.2)       | 0.719           | 70.3 (15.3)    | 0.889           | 44.5 (14.8) | 0.550           |
| Overweight                                          | 23             | 3057 (763)      | 562.6 (139.4)       |                 | 72.7 (20.4)    |                 | 46.6 (22.7) |                 |
| Obese                                               | 8              | 2775 (873)      | 508.4 (164.6)       |                 | 69.8 (21.5)    |                 | 43.0 (16.7) |                 |
| Total gestational weight gain category <sup>b</sup> |                |                 |                     |                 |                |                 |             |                 |
| Within                                              | 34             | 3074 (598)      | 564.3 (128.4)       |                 | 74.8 (13.9)    |                 | 46.5 (13.0) |                 |
| Below                                               | 75             | 2949.2 (705.4)  | 535.2 (134.4)       | 0.644           | 71.8 (17.5)    | 0.414           | 47.7 (18.7) | 0.551           |
| Over                                                | 5              | 2893 (876)      | 546.7 (175.2)       |                 | 65.3 (14.9)    |                 | 39.1 (15.2) |                 |
| Birth weight category                               |                |                 |                     |                 |                |                 |             |                 |
| <2500 g                                             | 21             | 2650 (774)      | 480.6 (152.3)       |                 | 65.6 (17.7)    |                 | 47.0 (18.0) |                 |
| 2500–4000 g                                         | 98             | 2938.1 (648.2)  | 532.7 (99.1)        | 0.192           | 72.6 (16.7)    | 0.187           | 41.7 (13.7) | 0.389           |
| >4000 g                                             | 2              | 3088 (756)      | 600.5 (148.9)       |                 | 63.4 (17.2)    |                 | 38.8 (12.7) |                 |

<sup>a</sup> Based on WHO international BMI cut-off values [6]. <sup>b</sup> Based on IOM 2009 re-examine guidelines [14]  
 Compared using one way ANOVA test. Sample sizes for each variable vary slightly because of missing data. BMI: Body mass index; LBW: low birth weight; SD: standard deviation; LKR: Sri Lankan rupee.
